# Supplementary material for: Solid-state NMR studies of the organic template in mesostructured aluminophosphates
Source: Royal Society of Chemistry journal article supplement (doi:10.1039/b007473j), 2001-01-01
Supplement: figures.doc [file figures.doc]

**Deconvolution of the 13C MAS NMR spectra**

Deconvolution of the region of the spectra corresponding to the inner-chain carbons has been carried out using standard procedure available within the software package Spinsight 4.1.1 Typical examples of deconvoluted spectra of Hex-1 and L1 with dominant *gauche* and all-*trans* conformations are given in the Figures S1 and S2, respectively.


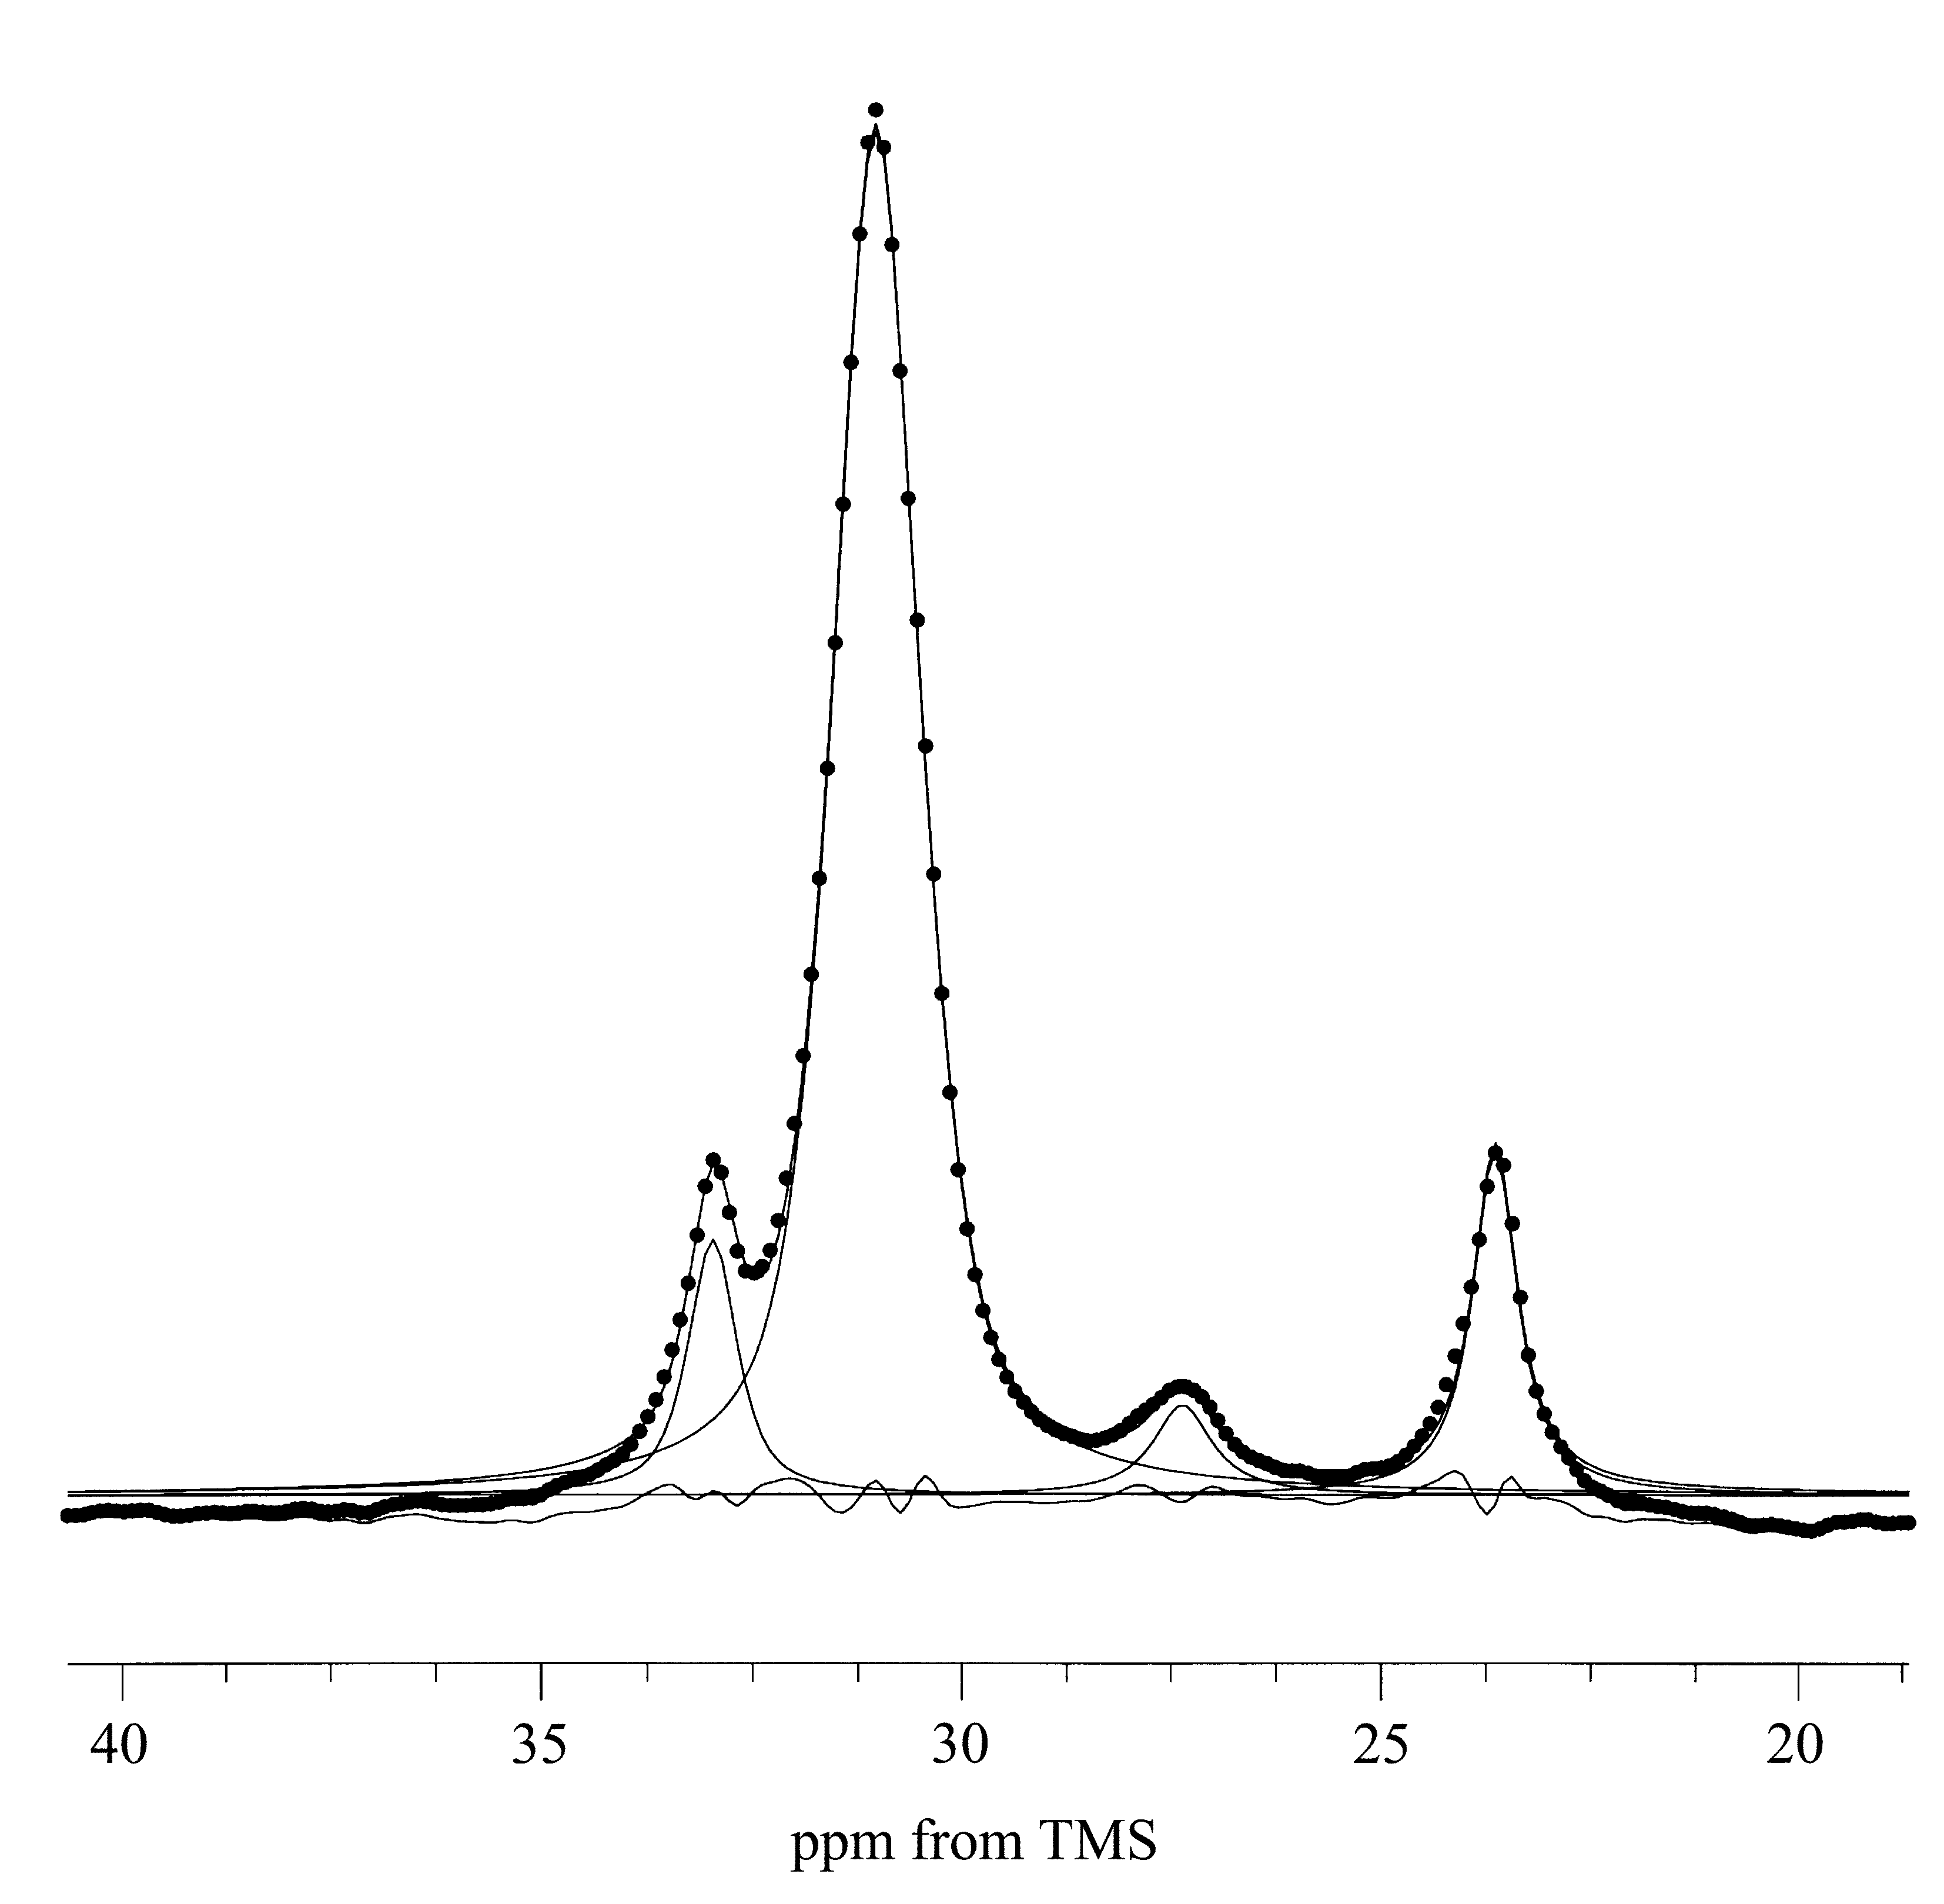


**Figure S1.** Deconvoluted 13C MAS NMR spectrum of Hex-1 AlPO.


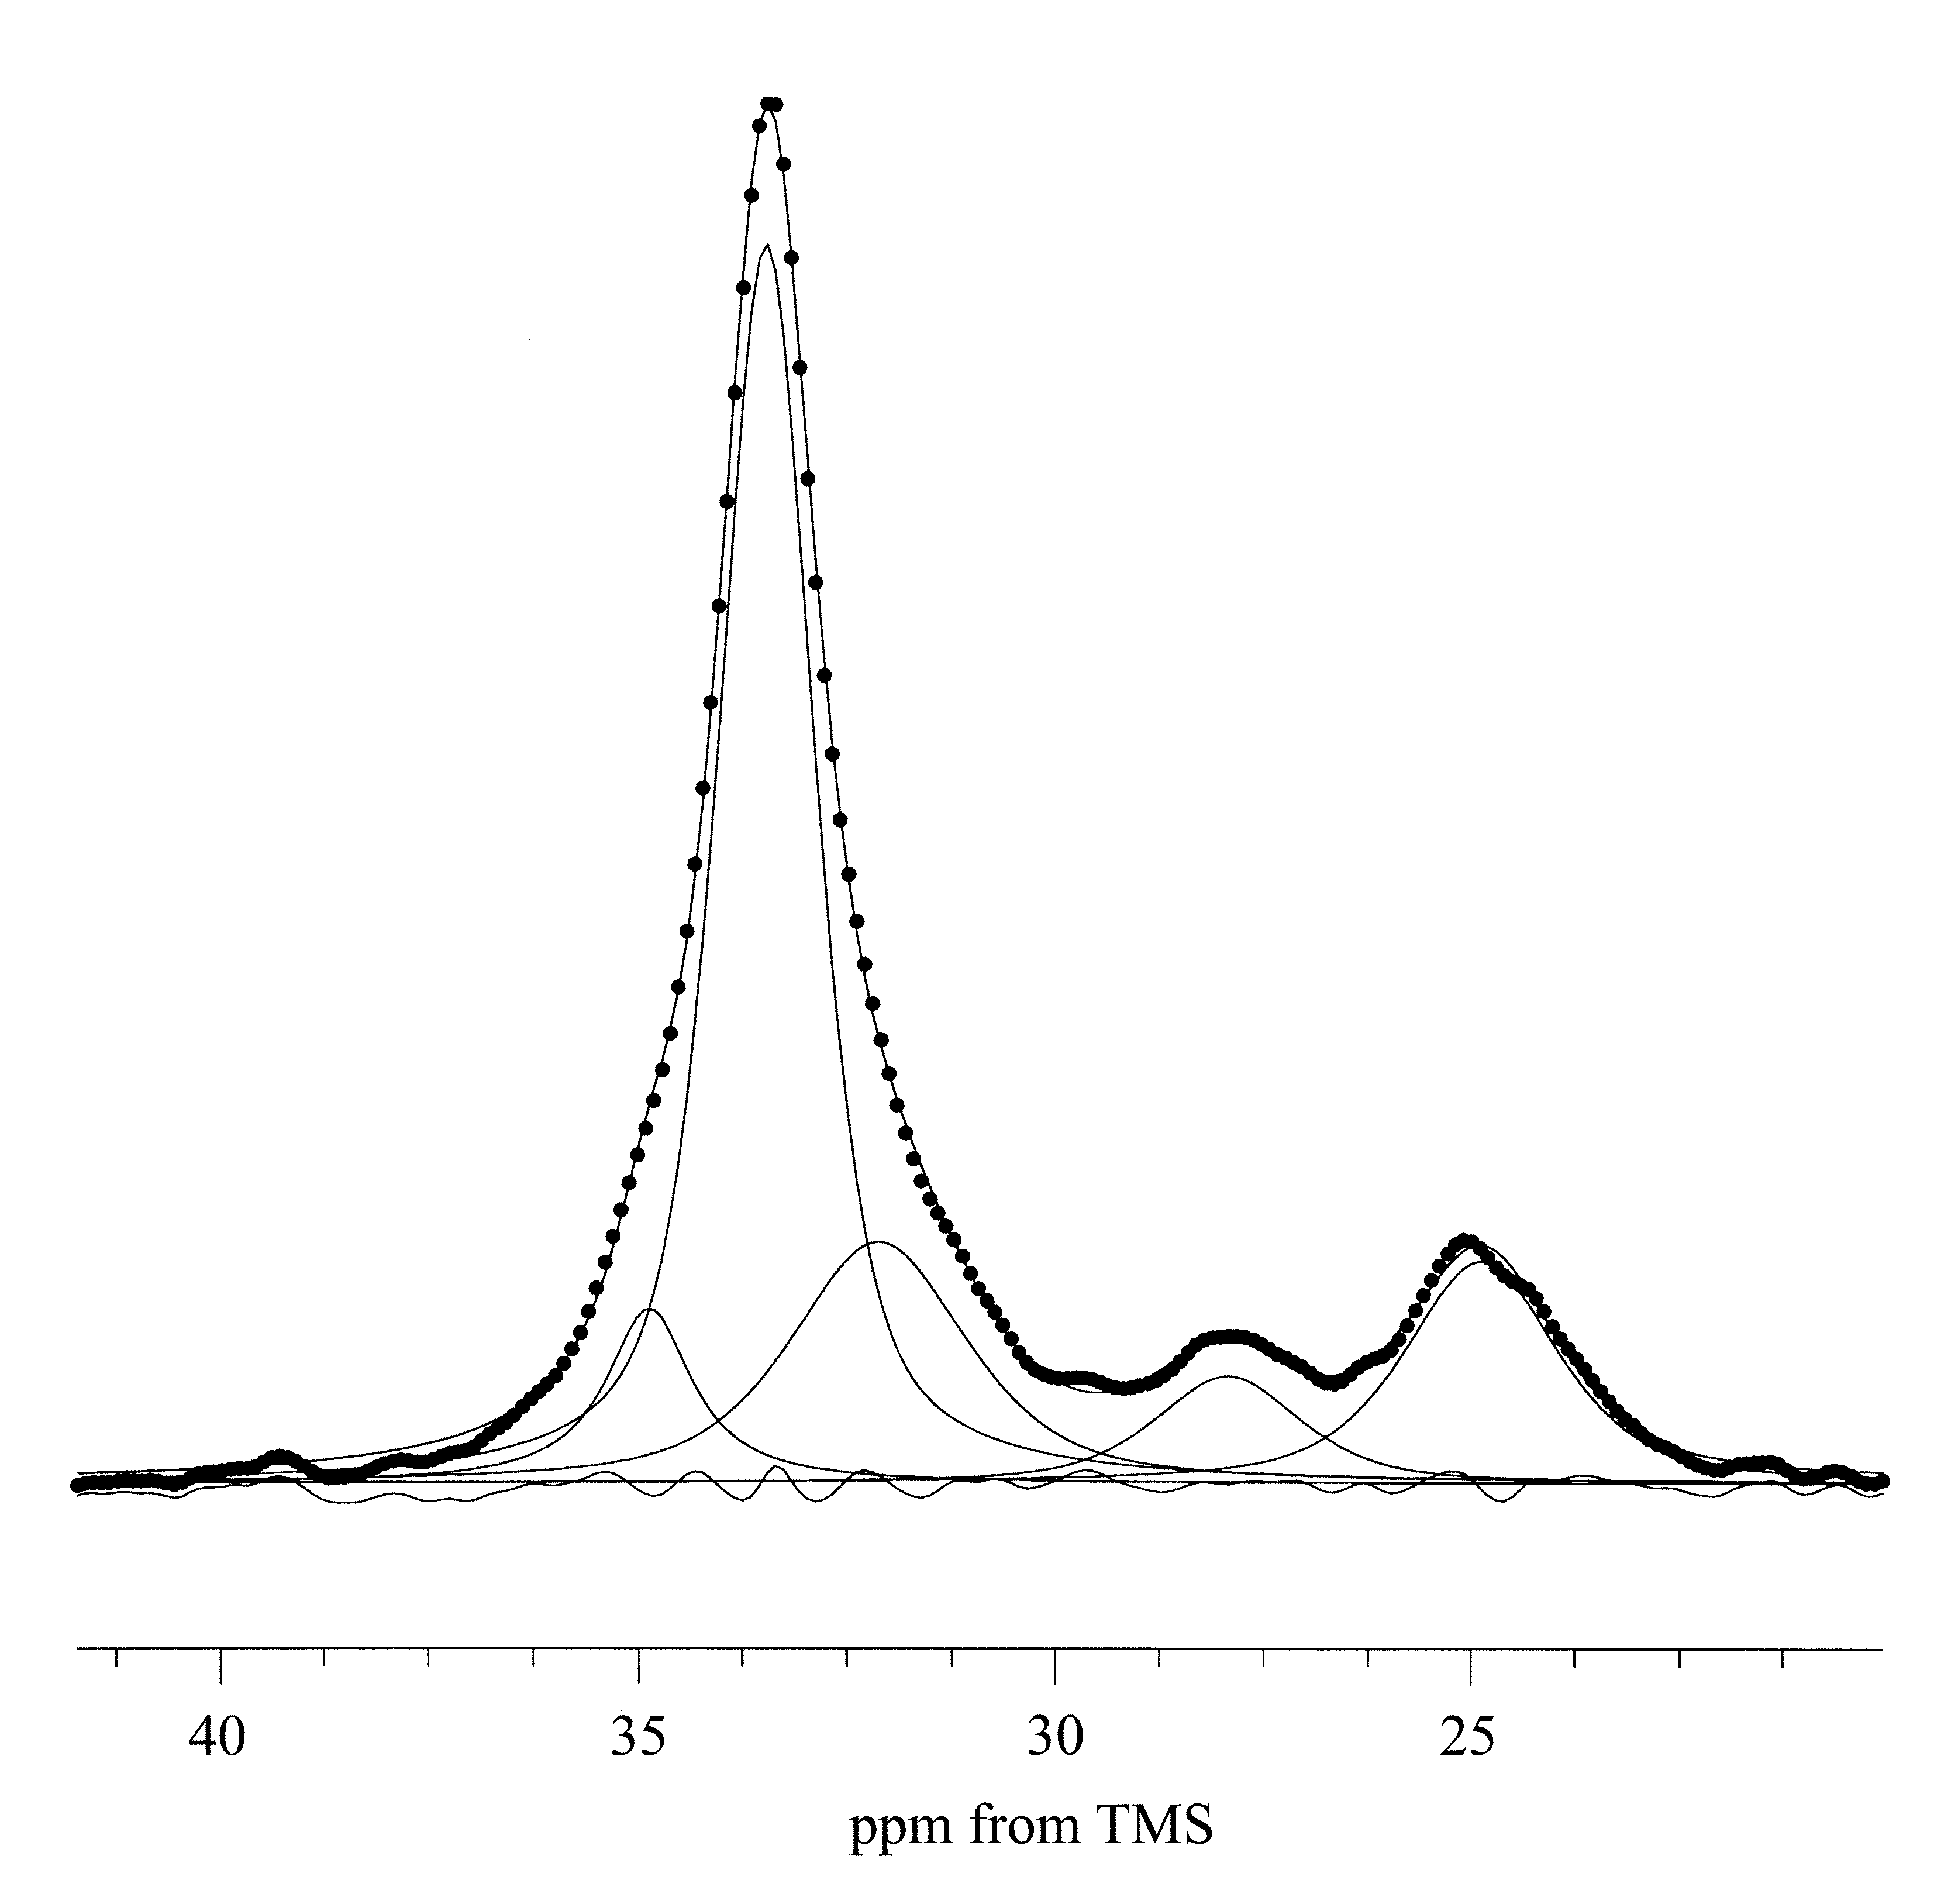


**Figure S2.** Deconvoluted 13C MAS NMR spectrum of L1 AlPO.

**Reference**

1. Varian Associates Inc., 1998.
